# Supplementary material
Source: PubMed Central journal article supplement (PMC2786564)
Supplement: supp_191_23_7174__1.pdf [file supp_191_23_7174__1.pdf]

**Table S1.** Primers used in construction of strains and plasmids.

| Primers                   | Sequences (5' to 3')                                                                           |
|---------------------------|------------------------------------------------------------------------------------------------|
| DE- <i>rstB</i> -F        | CGCGGATAGAGCTAATGTATTGAGATCCGGTGGG<br>CGTTGTGTAGGCTGGAGCTGCTTCG                                |
| DE- <i>rstB</i> -R        | ATAGCACAGTTCCCGCCGCTCAACCAGCGTGCAA<br>AATGCGCATATGAATATCCTCCTTAG                               |
| DE- <i>mgtA</i> (5'UTR)-F | ATTTTCCTTTTCCGGTAAGCCTGCCTCTGCTGTCTTA<br>CCGGTGTAGGCTGGAGCTGCTTC                               |
| DE- <i>mgtA</i> (5'UTR)-R | GGCGGGTAATGATTTTTAGCATAGGTAATCCCTCCG<br>CGCCATATGAATATCCTCCTTAGT                               |
| DE- <i>sitABCD</i> -F     | TATTCGATGATTAATTAACCACATTGTTGCGAGGGA<br>TACTTGTAGGCTGGAGCTGCTTCG                               |
| DE- <i>sitABCD</i> -R     | ATTATGACCGTATGTTTCCTGAATAGCAGGCAAAA<br>AAGTGATGAATATCCTCCTTAGTTC                               |
| DE- <i>mntH</i> -F        | AGCATGAAACATAGCAAAGGCTATGTTTTTGAGGC<br>AAAAGTGTAGGCTGGAGCTGCTTCG                               |
| DE- <i>mntH</i> -R        | CCGATGACGCCACGCATCGGGCCTGCTATCTTTCT<br>GTCTATGAATATCCTCCTTAGTTC                                |
| DE- <i>ackApta</i> -F     | CTGACGTTTTTTTAGCCACGTATCATAAATAGGTAC<br>TTCCTGTAGGCTGGAGCTGCTTCG                               |
| DE- <i>ackApta</i> -R     | ACAAGGCGTTCACGCCCATCCGGCATTAGCTTT<br>TACTGCATATGAATATCCTCCTTAG                                 |
| <i>rstA</i> -FLAG-F       | CTATCTTTTTGCCCTCATGCCTGGGACGAAACGA<br>CGGGAGACTACAAGGACGACGATGACAAGTGATG<br>TAGGCTGGAGCTGCTTCG |
| <i>rstA</i> -FLAG-R       | ACTATGACTTGATAAAGGCAGGTAAAATCTGTCCG<br>CTAACCATATGAATATCCTCCTTAG                               |
| CD- <i>rstA</i> -FLAG-F   | GCGGATCCAATATGAACCGCATTGTATTTGTTGAAG                                                           |
| CD- <i>rstA</i> -FLAG-R   | GCCTGCAGAACTCACTTGTATCGTCGTCCTTGTAG<br>TCTCC                                                   |
| SM- <i>rstA</i> (D52A)-F  | CCCGATCTGGTTTTACTGGCTATTATGCTTCCAGGT<br>AAA                                                    |
| SM- <i>rstA</i> (D52A)-R  | TTTACCTGGAAGCATAATAGCCAGTAAAACCAGAT<br>CGGG                                                    |
| CD- <i>phoP</i> -F        | GCGGATCCAAGGGAGAAGAGATGATGCGCGTAC                                                              |

CD-*phoP*-R

GCCTGCAGCATTAGCGCAATTCAAAAAGATATC

**Table S2.** Gene-specific primers used in quantitative real-time RT-PCR analysis.

| Primers     | Target genes                      | Sequences (5' to 3')   |
|-------------|-----------------------------------|------------------------|
| Q-feoB-F    | <i>feoB</i>                       | GTTCGTCATCTACCTGATGTTC |
| Q-feoB-R    | <i>feoB</i>                       | GCAGCCTGTAGCCAATCC     |
| Q-rstA-F    | <i>rstA</i>                       | GCATGACGATATGTCGCGATT  |
| Q-rstA-R    | <i>rstA</i>                       | ATCTCCAGCGCCAGAATATGA  |
| Q-mgtA(a)-F | <i>mgtA</i><br>(5'UTR)            | TAATTGCCACAAAATTATG    |
| Q-mgtA(a)-R | <i>mgtA</i><br>(5'UTR)            | TCGCGGGAGAGGGGTGGGT    |
| Q-mgtA(b)-F | <i>mgtA</i><br>(coding<br>region) | GGCAATGGAGCAGGAGACTCT  |
| Q-mgtA(b)-R | <i>mgtA</i><br>(coding<br>region) | CACCTCGGCAGCGTTTAATC   |
| Q-mgtB-F    | <i>mgtB</i>                       | TCGAAGCGGAAGCTTTTCAT   |
| Q-mgtB-R    | <i>mgtB</i>                       | TCATTGCGCCATACACTTTC   |
| Q-rrsH-F    | <i>rrsH</i>                       | CCAGCAGCCGCGGTAAT      |
| Q-rrsH-R    | <i>rrsH</i>                       | TTTACGCCAGTAATTCCGATT  |

**Figure S1. Transcription of the *feoB* gene is activated in the *ackA-pta* deletion strain grown at acidic pH.** RNA isolated from the wild-type (14028s) and *ackA-pta* deletion (EN252) strains grown in 2 mM Mg<sup>2+</sup> N-minimal medium buffered at pH 7.7 (H) or 5.7 (L). The *feoB* mRNA levels were determined using qRT-PCR. Shown are the mean values and standard deviations of three independent experiments.

**Figure S2. The Fur protein represses transcription of the *feoB* gene at acidic pH in the presence of iron.** RNA isolated from the wild-type (14028s), *rstA* deletion (JH101), and *fur* deletion (JH352) strains grown in 2 mM Mg<sup>2+</sup> N-minimal medium at pH 5.7 in the presence (20 μM) or absence of FeSO<sub>4</sub>. The *feoB* mRNA levels were determined using qRT-PCR. Shown are the mean values and standard deviations of three independent experiments.

**Figure S3. Expression of the *mgtB* gene is promoted only when *Salmonella* starves for Mg<sup>2+</sup>.** The wild-type (14028s) and *phoPQ* deletion (DS267) strains were grown to OD<sub>600</sub>=0.4 in N-minimal medium at pH 7.7 with 2 mM Mg<sup>2+</sup> and transferred to the medium at pH 7.7 or 5.7 in the presence (10 mM) or absence of Mg<sup>2+</sup>. After 30 min, RNA was isolated from the strains, and the levels of *mgtB* mRNA determined by qRT-PCR. Shown are the mean values and standard deviations of three independent experiments.

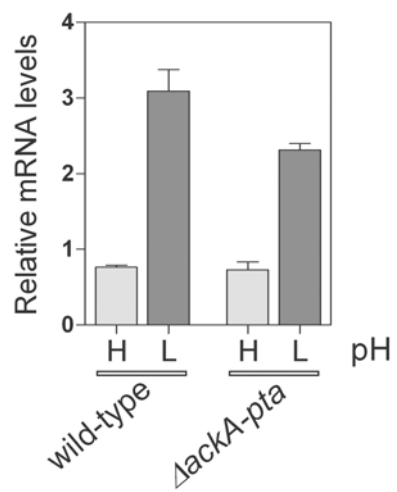

Figure S1

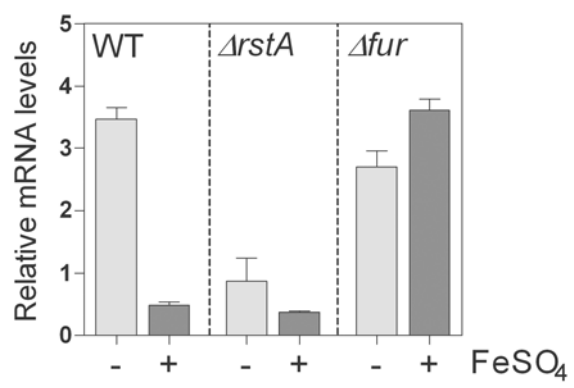

Figure S2

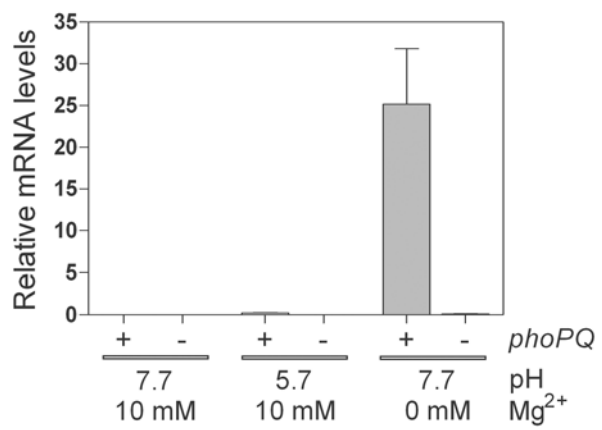

Figure S3
